# Supplementary material for: Mitochondria ubiquitin ligase, MARCH5 resolves hepatitis B virus X protein aggregates in the liver pathogenesis
Source: PubMed Central journal article supplement (PMC6901512; doi:10.1038/s41419-019-2175-z), 2019-12-09

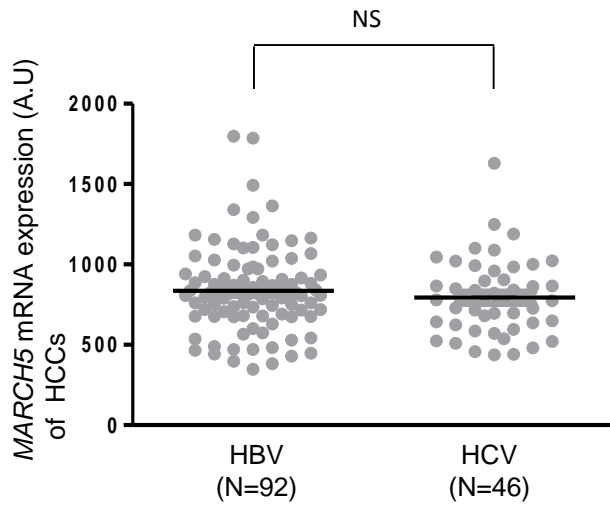

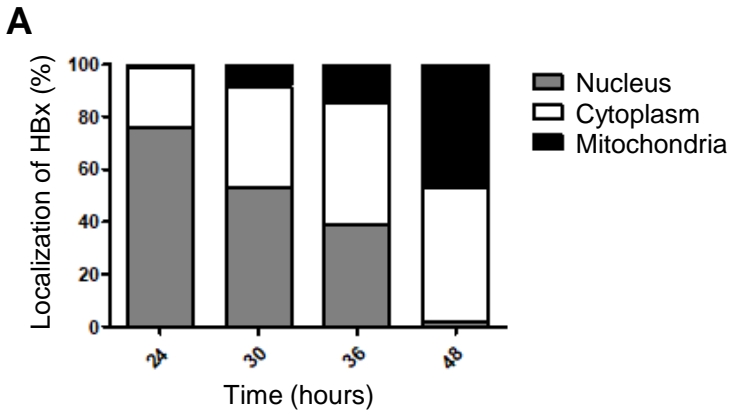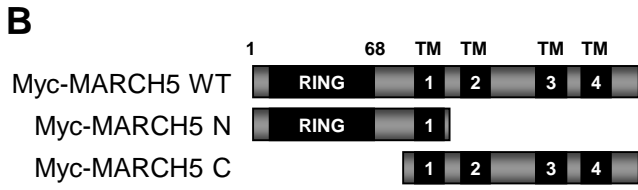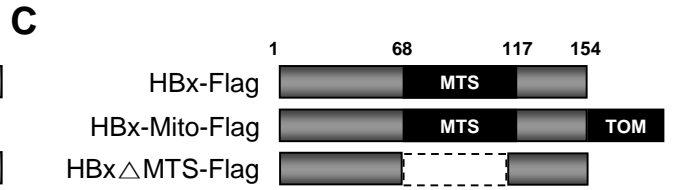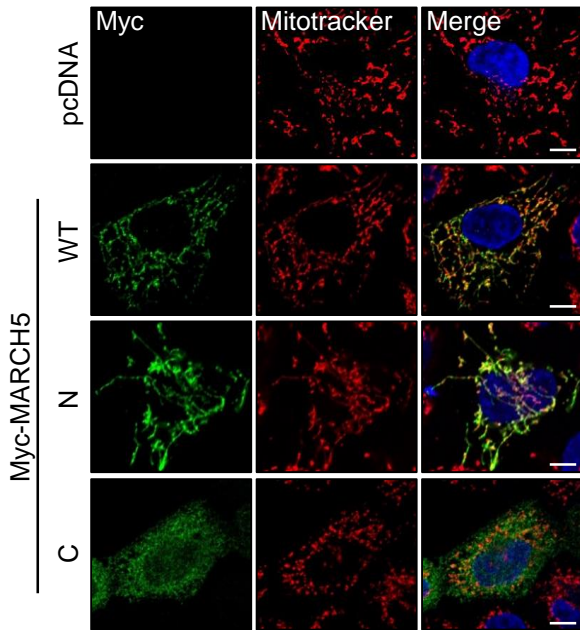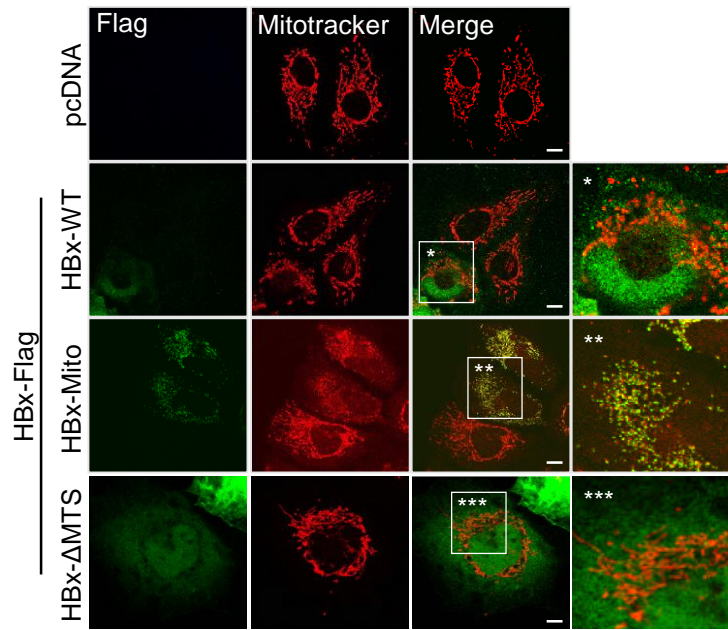

**A**

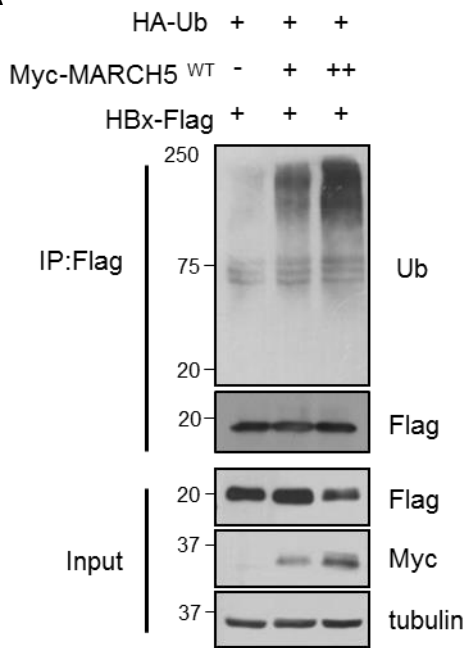

**B**

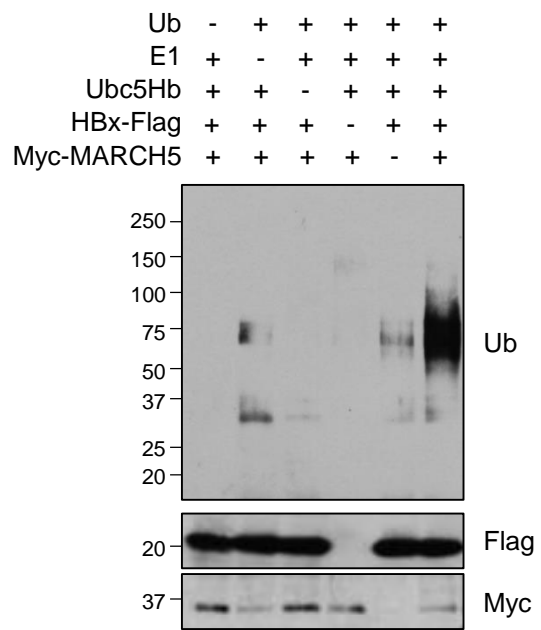

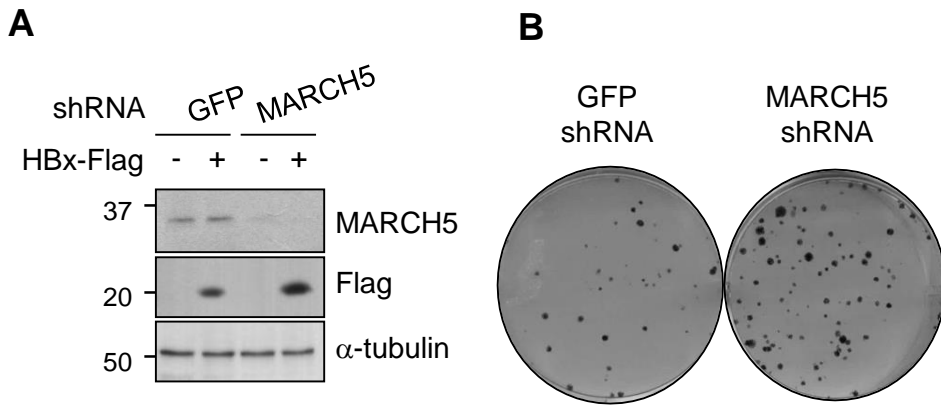

Supplement: 41419_2019_2175_MOESM2_ESM.pdf [file 41419_2019_2175_MOESM2_ESM.pdf]
